# Supplementary material
Source: publisher figshare collection journal article supplement (https://tandf.figshare.com/articles/dataset/_/14994204)
Supplement: Supplementary file 1 [file 1]

Supplementary material to:

# **Bioavailability and pharmacokinetic profile of balovaptan, a selective, brain-penetrant vasopressin 1a receptor antagonist, in healthy volunteers**

*European Journal of Clinical Pharmacology*

*Michael Derks, Sian Lennon-Chrimes, Andreas Guenther, Lisa Squassante, Christoph Wandel, Piotr Szczesny, Axel Paehler & Heidemarie Kletzl*

**Corresponding author:**

Michael Derks

Roche Products Ltd, Hexagon Place, 6 Falcon Way, Welwyn Garden City, Hertfordshire, United Kingdom, AL7 1TW

ORCID ID: 0000-0002-4918-7828

e-mail: michael.derks@roche.com

Telephone no.: +44 1707 366167

**Supplementary material**

**Inclusion/exclusion criteria for study NCT03764449 (absolute balovaptan bioavailability)** 3

**Inclusion/exclusion criteria for study NCT01418963 (single and multiple ascending doses and effect of food on balovaptan PK)** 6

**Table S1.** Schedule of PK assessments in study NCT03764449 (balovaptan absolute bioavailability). 8

**Fig. S1** Concentration–time plots and derived PK parameters of total plasma balovaptan for 10 mg and 50 mg oral administration on (**a**) period 1 Day 1 (single dose), and (**b**) period 2 Day 14 (after 13 days of once-daily dosing). 9

**Fig. S2** Concentration–time plots and derived PK parameters for i.v. infused [13C]-balovaptan 0.1 mg given 1.25 hours after a single dose (period 1 Day 1) or multiple doses (period 2 Day 14) of oral balovaptan. (**a**) 10 mg oral balovaptan all subjects (*N*=8); (**b**) 10 mg oral balovaptan on Day 14 only, individual profiles, showing two participants with unexpectedly high values at certain time points; (**c**) 10 mg oral balovaptan excluding the two anomalous participants (*N*=6 on both days); (**d**) 50 mg oral balovaptan all subjects (*N*=8). 10

**Fig. S3** Participant disposition in study NCT01418963 (SAD, MAD, and food effect). 11

**Fig. S4** Single-dose balovaptan concentration–time profiles. (**a**) mean (SD) data for all six subjects in each dosing group; (**b**) individual concentration–time data for subjects in the 12 mg dosing group showing persistent balovaptan in one outlier; (**c**) mean (SD) data excluding the outlier in the 12 mg group. 12

**Fig. S5** Balovaptan dose proportionality in study NCT01418963 Part 1 (SAD). 13

**Inclusion/exclusion criteria for study NCT03764449 (absolute balovaptan bioavailability)**

**Inclusion criteria**

1. Healthy male and female subjects aged 18 years to 65 years, inclusive, at screening. Healthy status was defined by absence of evidence of any active or chronic disease following a detailed medical and surgical history, a complete physical examination including vital signs, 12-lead electrocardiogram (ECG), hematology, blood chemistry, urinalysis, and serology.
2. Body mass index (BMI) of 18 kg/m2 to 30 kg/m2, inclusive, at screening.
3. For women of childbearing potential: agreement to use at least two acceptable contraceptive methods during the treatment period and for 90 days after the last dose of study drug. Also, total abstinence, in accordance with the lifestyle of the subject, was acceptable.

- A woman was considered to be of childbearing potential if she was post-menarcheal, had not reached a postmenopausal state (≥12 continuous months of amenorrhea with no identified cause other than menopause), and had not undergone surgical sterilization (removal of ovaries and/or uterus).
- The following were acceptable contraceptive methods: bilateral tubal ligation; male sterilization; hormonal contraceptives; hormone-releasing intrauterine devices; copper intrauterine devices; male or female condom with or without spermicide (male and female condom had not to be used simultaneously); and cap, diaphragm, or sponge with spermicide.
- Hormonal contraceptive methods had to be supplemented by a barrier method.

1. For men: agreement to use contraceptive measures, and agreement to refrain from donating sperm, as defined below:

- With female partners of childbearing potential or pregnant female partners, men had to remain abstinent or use a condom during the treatment period and for 90 days after the last dose of study drug to avoid exposing the embryo. Men had to refrain from donating sperm during this same period.

1. Able to participate and willing to give written informed consent and to comply with the study restrictions.
2. Fluent in English or Dutch.

**Exclusion criteria**

Subjects were excluded from participation if any of the following exclusion criteria applied:

1. Female subjects who were pregnant or lactating.
2. If female of childbearing potential, a positive serum pregnancy test at screening or at admission to the clinical research unit (Day -1 of each period).
3. Any condition or disease detected during the medical interview/physical examination that would render the subject unsuitable for the study, place the subject at undue risk or interfere with the ability of the subject to complete the study in the opinion of the investigator.
4. In the opinion of the investigator, any major illness within 1 month before the screening examination or any febrile illness within 1 week prior to screening and up to first study drug administration.
5. History of any clinically significant gastrointestinal, renal, hepatic, broncho‑pulmonary, neurologic, psychiatric, cardiovascular, endocrinologic, hematologic, lymphatic, musculoskeletal, genitourinary, immunological, dermatologic, connective tissue or allergic disease, metabolic disorder, or cancer.
6. Signs and symptoms potentially indicative of peripheral neuropathy.
7. History or evidence of any medical condition potentially altering the absorption, metabolism, or elimination of drugs. Surgical history of the gastrointestinal tract affecting gastric motility or altering the gastrointestinal tract, with the exception of uncomplicated appendectomy, which was allowed.
8. A history of clinically significant hypersensitivity (e.g., to drugs, including balovaptan, and excipients) or allergic reactions.
9. Known personal or family history of congenital long QT syndrome or sudden death.
10. History or presence of clinically significant ECG abnormalities before study drug administration.
11. Subjects with screening or predose baseline mean QT-interval corrected using Fridericia’s formula (QTcF) >450 msec or <300 msec (using the same upper QTcF limit in both males and females).
12. Notable resting bradycardia (mean heart rate [HR] <40 bpm) on screening or predose baseline ECG. Notable resting tachycardia (mean HR >90 bpm) on screening or predose (>100 bpm) baseline ECG.
13. Screening or baseline ECGs with QRS and/or T-wave judged to be unfavorable for a consistently accurate QT measurement (i.e., neuromuscular artifact that cannot be readily eliminated, arrhythmias, indistinct QRS onset, low amplitude T-wave, merged T- and U-waves, prominent U-waves, etc).
14. Screening or baseline ECG with evidence of clinically relevant abnormalities, e.g., atrial fibrillation, atrial flutter, complete bundle branch block, Wolf-Parkinson-White Syndrome, or cardiac pacemaker.
15. Systolic blood pressure (SBP) greater than 139 or less than 90 mmHg, or diastolic blood pressure (DBP) greater than 89 or less than 45 mmHg, based on the average of ≥3 consecutive measurements.
16. Clinically significant abnormalities in laboratory test results (including hepatic and renal panels, complete blood count, chemistry panel, coagulation parameters, and urinalysis). In the case of uncertain or questionable results, tests performed during screening could be repeated on Day -1 of period 1 to confirm eligibility.
17. History of coagulopathies, bleeding disorders, or blood dyscrasias.
18. Subjects who smoked within 3 months prior to first dose administration.
19. Any clinically relevant history or any suspicion of alcohol and/or other substance abuse or addiction. Past alcohol and/or other substance abuse or addiction was also not allowed.
20. Alcohol consumption of >24 units per week for males and females. One unit of alcohol equals ½ pint (285 mL) of beer or lager, 1 glass (125 mL) of wine, or 1/6 gill (25 mL) of spirits.
21. Positive urine alcohol test or urine drug screen at screening or Day -1 of each treatment period (barbiturates, benzodiazepines, methadone, amphetamines [including ecstasy], methamphetamines, opiates, cocaine, and cannabinoids).
22. Positive result on HIV1, HIV2, hepatitis C virus antibody, or hepatitis B core antibody screen.
23. Participation in an investigational drug or device study within 90 days prior to first dosing, or within 5 months prior to first dosing in case of a study with a biologic, as calculated from the day of follow-up from the previous study.
24. Any donation of blood or plasma or significant blood loss within 3 months prior to screening.
25. Dietary restrictions that would prohibit the consumption of standardized meals.
26. Use of any prohibited medications or food before study start and subjects who did not agree to refrain from consuming prohibited medications or food during the study.
27. Subjects likely to need concomitant medication during the study (including for dental conditions).
28. Subjects who received any prescribed systemic or topical medication within 4 weeks (or within five times the elimination half-life of the medication, whichever was longer) of the first dose administration, unless in the opinion of the investigator the medication would not interfere with the study procedures or compromise safety, and subjects who had received slow release medicinal formulations considered to still be active within 4 weeks (or within five times the elimination half-life of the medication, whichever was longer) of the first dose administration were also excluded unless in the opinion of the investigator the medication would not interfere with the study procedures or compromise safety.
29. Used the following within 7 days before the first study drug administration, unless in the opinion of the investigator the medication would not interfere with the study procedures or compromise safety:

- Any non-prescribed systemic or topical medication
- Herbal remedies.

Paracetamol (up to 4 g within 7 days before study drug administration and 2 g/day within 48 hours before study drug administration), dietary supplements, vitamins and minerals, hormonal contraceptives and hormone replacement therapy were allowed.

1. Received any medications known to chronically alter drug absorption or elimination processes within 4 weeks before the first study drug administration, unless in the opinion of the investigator the medication would not interfere with the study procedures or compromise safety.
2. Use of any drugs or substances, including herbal treatments such as St. John’s wort, that were known to be substrates, inducers, or inhibitors of CYP3A4 within 4 weeks before the first study drug administration.
3. Subjects under judicial supervision, guardianship, or curatorship.
4. Poor venous access for blood sampling.
5. Subjects who had previously taken part in or withdrawn from this study.
6. Subjects who were unwilling to practice safe sex (use male or female condom) for the duration of the study.
7. For subjects with planned lumbar punctures, the following additional exclusion criteria applied:

- Had a history of clinically significant back pain, back pathology, and/or back injury (e.g., degenerative disease, spinal deformity, or spinal surgery) that may predispose to complications from, or technical difficulty with, a lumbar puncture, OR
- Had criteria that would preclude a lumbar puncture, such as a local infection at the site of the lumbar puncture; clinically significant coagulation parameter abnormalities, or treatment with an anticoagulant or with antiplatelet agents within 6 weeks prior to the day of lumbar puncture, OR
- Had history of clinically significant hypersensitivity to local anesthetics that could be used for lumbar puncture (e.g., lidocaine).

1. Significant risk for suicidal behavior, in the opinion of the investigator.

# **Inclusion/exclusion criteria for study NCT01418963 (single- and multiple-ascending doses and effect of food on balovaptan PK)**

**Inclusion criteria**

Subjects were required to meet all the following criteria to be included in the study:

1. Parts 1 (single-ascending dose [SAD]) and 2 (food effect): Healthy male subjects, 18–45 years of age, inclusive. Part 3 (multiple-ascending dose [MAD]): Healthy male and female subjects, 18–65 years of age, inclusive. Healthy status was defined by absence of evidence of any active or chronic disease following a detailed medical and surgical history, a complete physical examination including vital signs, 12-lead ECG, hematology, blood chemistry, serology, and urinalysis.

2. A BMI between 18.0–30.0 kg/m2 inclusive.

3. Part 3 only: Female subjects must have been surgically sterile (tubal ligation or bi-ovariectomy or hysterectomy) or postmenopausal (no spontaneous menstrual period for at least 1 year, confirmed by a hormone panel at screening).

4. Male subjects must have used a barrier method of contraception for the duration of the study and for the 3 months after last dosing.

5. Was able to participate and willing to give written informed consent and to comply with the study restrictions.

**Exclusion criteria**

Subjects who met any of the following criteria were excluded from the study:

1. Suspicion of regular consumption of drugs of abuse.

2. History of drug or alcohol abuse.

3. Positive result on hepatitis B, hepatitis C, or HIV1 and 2.

4. Sustained (based on the average of ≥3 blood pressure measurements, properly measured with well-maintained equipment) SBP >140 or <90 mmHg, and DBP >90 or <50 mmHg.

5. Notable resting bradycardia (HR <40 bpm) or tachycardia (HR >90 bpm).

6. Use of any medication or herbal remedies taken within 14 days prior to randomization into the study or five times the elimination half-life of the medication, whichever is longer, with the exception of vitamins and paracetamol up to 2 g per day, which were allowed up to 48 hours before dosing, and stable hormonal replacement therapy.

7. Use of drugs acting on platelets such as aspirin, clopidogrel, dipyridamole, ticlopidine, or with anticoagulant effect like heparin or warfarin, in the last 4 weeks before dosing.

8. Intake of drug or herbal cytochrome P450 (CYP) 3A modulators (e.g., erythromycin, St. John’s Wort) within 4 weeks before study drug administration, or other nutrients known to modulate CYP3A activity (e.g., grapefruit juice, Seville orange) within 1 week prior to study drug administration.

9. Clinically significant abnormalities in laboratory test results (including hepatic and renal panels, complete blood count, chemistry panel, and urinalysis).

10. Participation in an investigational drug or device study within 3 months prior to first dosing.

11. Donation of blood within 3 months prior to first dosing.

12. History of hypersensitivity or allergic reactions.

13. History or presence of clinically significant ECG abnormalities (e.g., PQ/pulse rate [PR] interval >210 ms, QTcF >450 ms) or cardiovascular disease (e.g., cardiac insufficiency, coronary artery disease, cardiomyopathy, hypokalemia, congestive heart failure, family history of congenital long QT syndrome, family history of sudden death).

14. Any personal or family history of seizures, epilepsy or other convulsive condition, previous significant head trauma, or other factors predisposing to seizures.

15. Disorders of the central nervous system, including psychiatric disorders, behavioral disturbances, cerebrovascular events, depression, bipolar disorder, migraine, and Parkinson’s disease.

16. Regular smoker (>5 cigarettes, >3 pipe-fulls, >3 cigars per day).

17. Dietary restrictions that would have prohibited the consumption of standardized meals.

18. History or evidence of any medical condition potentially altering the absorption, metabolism or elimination of drugs.

19. Known family or individual history of glucose-6-phosphate dehydrogenase deficiency, a congenital galactosemia, a glucose or galactose malabsorption syndrome, or lactase deficiency.

20. History or evidence of any clinically significant endocrinologic, hepatic, renal, autoimmune, pulmonary, gastrointestinal, urogenital, oncologic, hematologic, or any other disease.

21. Concomitant disease or condition or any clinically significant finding at screening that could have interfered with, or for which the treatment of might have interfered with, the conduct of the study, or that would have, in the opinion of the investigator, posed an unacceptable risk to the subject in this study.

22. Part 3 only: Contraindications for magnetic resonance imaging scans (including but not restricted to claustrophobia, pacemaker, artificial heart valves, cochlear implants, presence of foreign metal objects in head or body, intracranial vascular clips, etc.) or any brain/head abnormalities restricting magnetic resonance imaging eligibility.

23. Subjects under judicial supervision, guardianship, or curatorship.

**Table S1.** Schedule of PK assessments in study NCT03764449 (balovaptan absolute bioavailability).

| **Procedure** | | **Blood sampling for total balovaptan** | | | | | | | | **Blood sampling for [13C]‑balovaptan** | |
| --- | --- | --- | --- | --- | --- | --- | --- | --- | --- | --- | --- |
| Study period | | **Period 1** | **Period**  **2** | | | | | | | **Period 1** | **Period**  **2** |
| Study day | | **1** | **1** | **2** | **7** | **8** | **12** | **13** | **14** | **1** | **14** |
| Predose | | X | X | X | X | X | X | X | X |  |  |
| **Hours post-oral dose** | 0.25 | X |  |  |  |  |  |  |  |  |  |
| 0.5 | X |  |  |  |  |  |  | X |  |  |
| 1 | X |  |  |  |  |  |  | X |  |  |
| 1.25 | X |  |  |  |  |  |  | X | Xa | Xa |
| 1.33 | X |  |  |  |  |  |  | X | X | X |
| 1.5 | X |  |  |  |  |  |  | X | X | X |
| 1.75 | X |  |  |  |  |  |  | X | X | X |
| 2 | X |  |  | X |  |  |  | X | X | X |
| 2.25 | X |  |  |  |  |  |  | X | X | X |
| 2.5 | X |  |  |  |  |  |  | X | X | X |
| 3 | X |  |  | X |  |  |  | X | X | X |
| 3.5 | X |  |  |  |  |  |  | X | X | X |
| 4 | X |  |  | X |  |  |  | X | X | X |
| 4.5 | X |  |  |  |  |  |  | X | X | X |
| 5 | X |  |  |  |  |  |  | X | X | X |
| 6 | X |  |  | X |  |  |  | X | X | X |
| 8 | X |  |  |  |  |  |  | X | X | X |
| 12 | X |  |  | X |  |  |  | X | X | X |
| 16 (P1/D2 or P2/D15) | X (D2) |  |  |  | X |  |  | X (D15) | X | X (D15) |
| 24 (P1/D2 or P2/D15) | X (D2) |  |  |  |  |  |  | X (D15) | X | X (D15) |
| 48 (P1/D3 or P2/D16) | X (D3) |  |  |  |  |  |  | X (D16) | X | X (D16) |
| 60 (P1/D3 or P2/D16) | X (D3) |  |  |  |  |  |  | X (D16) | X | X (D16) |
| 72 (P1/D4 or P2/D17) | X (D4) |  |  |  |  |  |  | X (D17) | X | X (D17) |
| 96 P1/D5 or P2/D18) | X (D5) |  |  |  |  |  |  | X (D18) | X | X (D18) |
| 108 (P1/D5 or P2/D18) | X (D5) |  |  |  |  |  |  | X (D18) | X | X (D18) |
| 120 (D6) | X (D6) |  |  |  |  |  |  |  |  |  |
| 144 (D7) | X (D7) |  |  |  |  |  |  |  |  |  |
| 168 (D8) | X (D8) |  |  |  |  |  |  |  |  |  |
| 192 (D9) | X (D9) |  |  |  |  |  |  |  |  |  |
| 216 (D10) | X (D10) |  |  |  |  |  |  |  |  |  |

a Sample was taken as shortly as possible prior to start of intravenous infusion

*D* day, *P1* period 1, *P2* period 2, *PK* pharmacokinetic

**Figure S1.** Concentration–time plots and derived PK parameters of total plasma balovaptan for 10 mg and 50 mg oral administration on (**a**) Period 1 Day 1 (single dose), and (**b**) Period 2 Day 14 (after 13 days of once-daily dosing). At each time point, an i.v. microdose of [13C]-balovaptan 0.1 mg was infused 1.25 hours after the oral dose.

*AUCinf* area under the balovaptan plasma concentration–time curve extrapolated to infinite time; *AUC24h* area under the concentration time curve at 24 hours; *Cmax*maximum plasma concentration;*i.v.* intravenous; *PK* pharmacokinetic; *SD* standard deviation; *T1/2* terminal elimination of half-life of balovaptan;*Tmax*time to Cmax

| **(a)** | **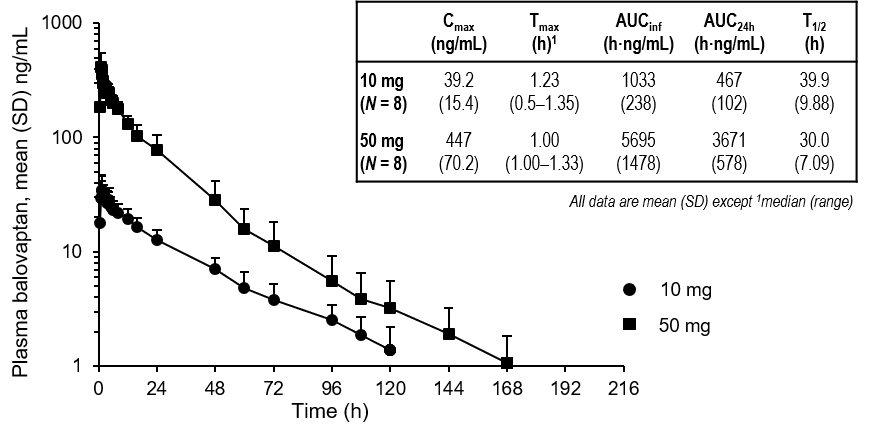** |
| --- | --- |
| **(b)** | **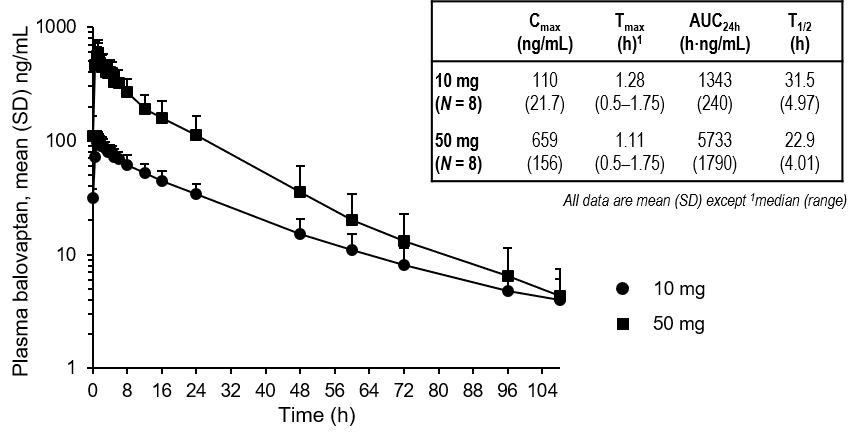** |

**Figure S2.** Concentration–time plots and derived PK parameters for i.v. infused [13C]-balovaptan 0.1 mg given 1.25 hours after a single dose (period 1 Day 1) or multiple doses (period 2 Day 14) of oral balovaptan. (**a**) 10 mg oral balovaptan all subjects (*N*=8); (**b**) 10 mg oral balovaptan on Day 14 only, individual profiles, showing two participants with unexpectedly high values at certain time points; (**c**) 10 mg oral balovaptan excluding the two anomalous participants (*N*=6 on both days); (**d**) 50 mg oral balovaptan all subjects (*N*=8).

*AUCinf* area under the balovaptan plasma concentration–time curve extrapolated to infinite time; *Cmax*maximum plasma concentration; *CL* clearance;*i.v.* intravenous; *PK* pharmacokinetic; *SD* standard deviation; *Tmax*time to Cmax;*Vss* volume of distribution at steady state.

| **(a))**  **(b)** | 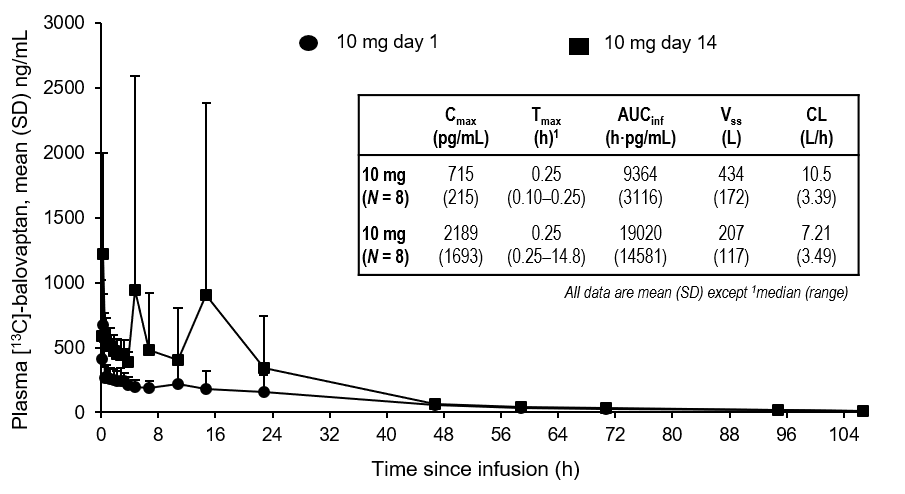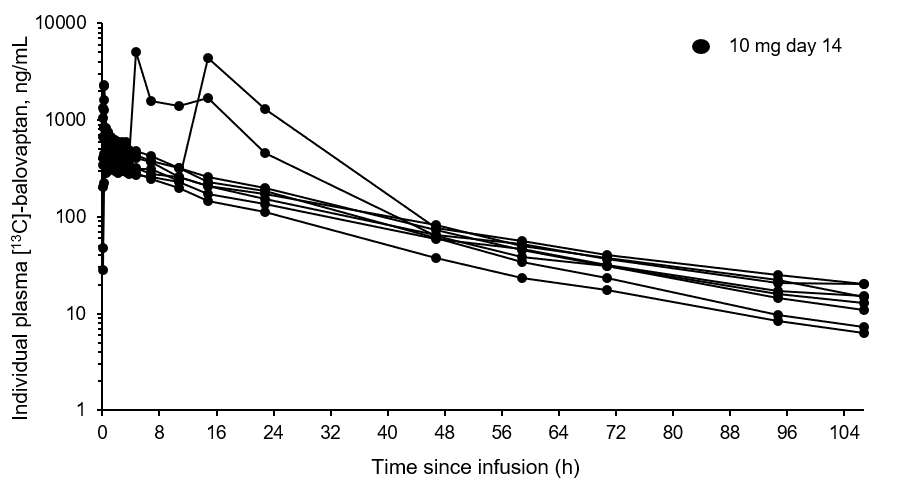 |
| --- | --- |
| **(c)** | 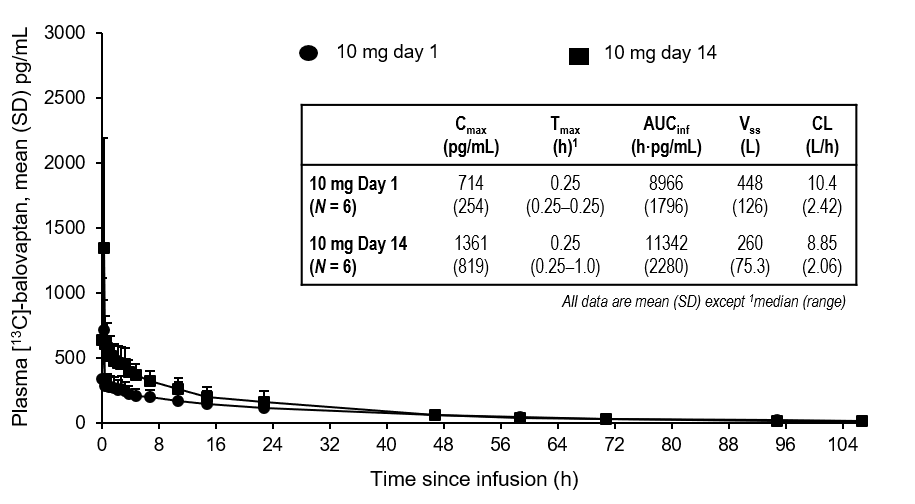 |
| **(d)** | 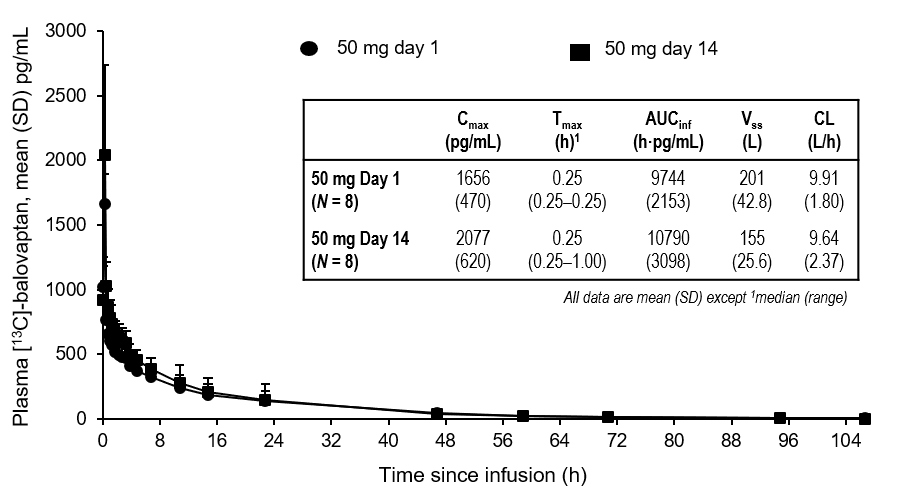 |

**Figure S3.** Participant disposition in study NCT01418963 (SAD, MAD, and food effect).
a Withdrawn subject replaced for period 2. b Dose escalation stopped in Cohort 4 after 76 mg for exposure cap. *AE* adverse event; *MAD* multiple-ascending dose; *QD* once daily; *RO5285119* balovaptan; *SAD* single-ascending dose.

| **Part 1** |
| --- |
| 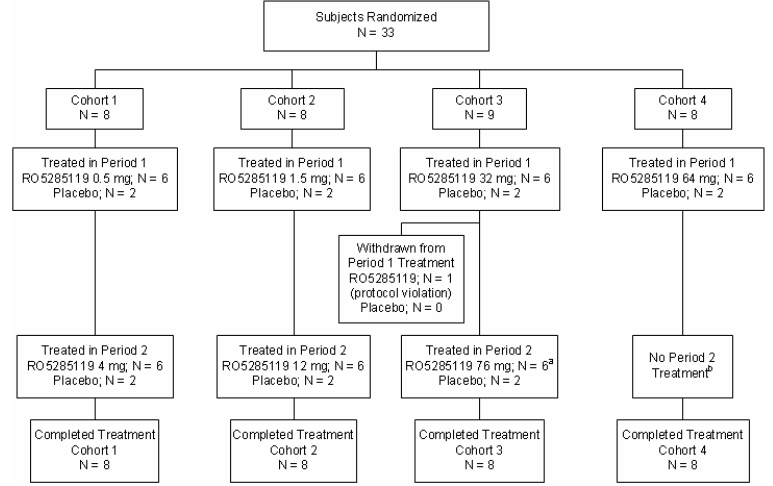 |
| **Part 2** |
| 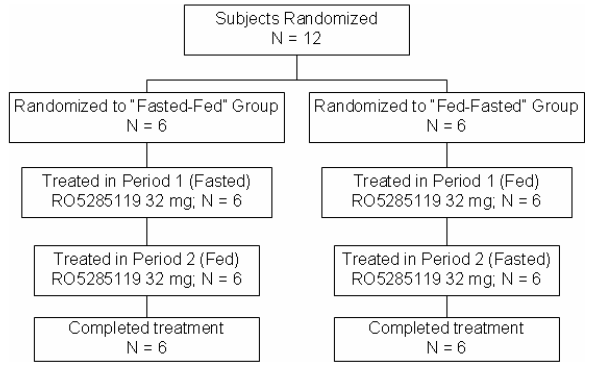 |
| **Part 3** |
| **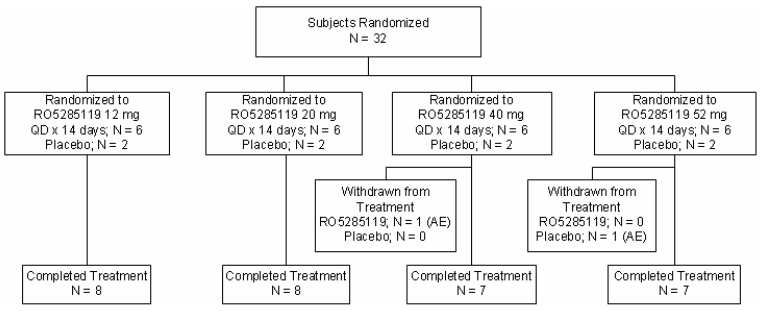** |

# **Figure S4.** Single-dose balovaptan concentration–time profiles. (**a**) Mean (SD) data for all six subjects in each dosing group; (**b**) Individual concentration–time data for subjects in the 12 mg dosing group showing persistent balovaptan in one outlier; (**c**) Mean (SD) data excluding the outlier in the 12 mg group. *SD* standard deviation.

| **(a)** | 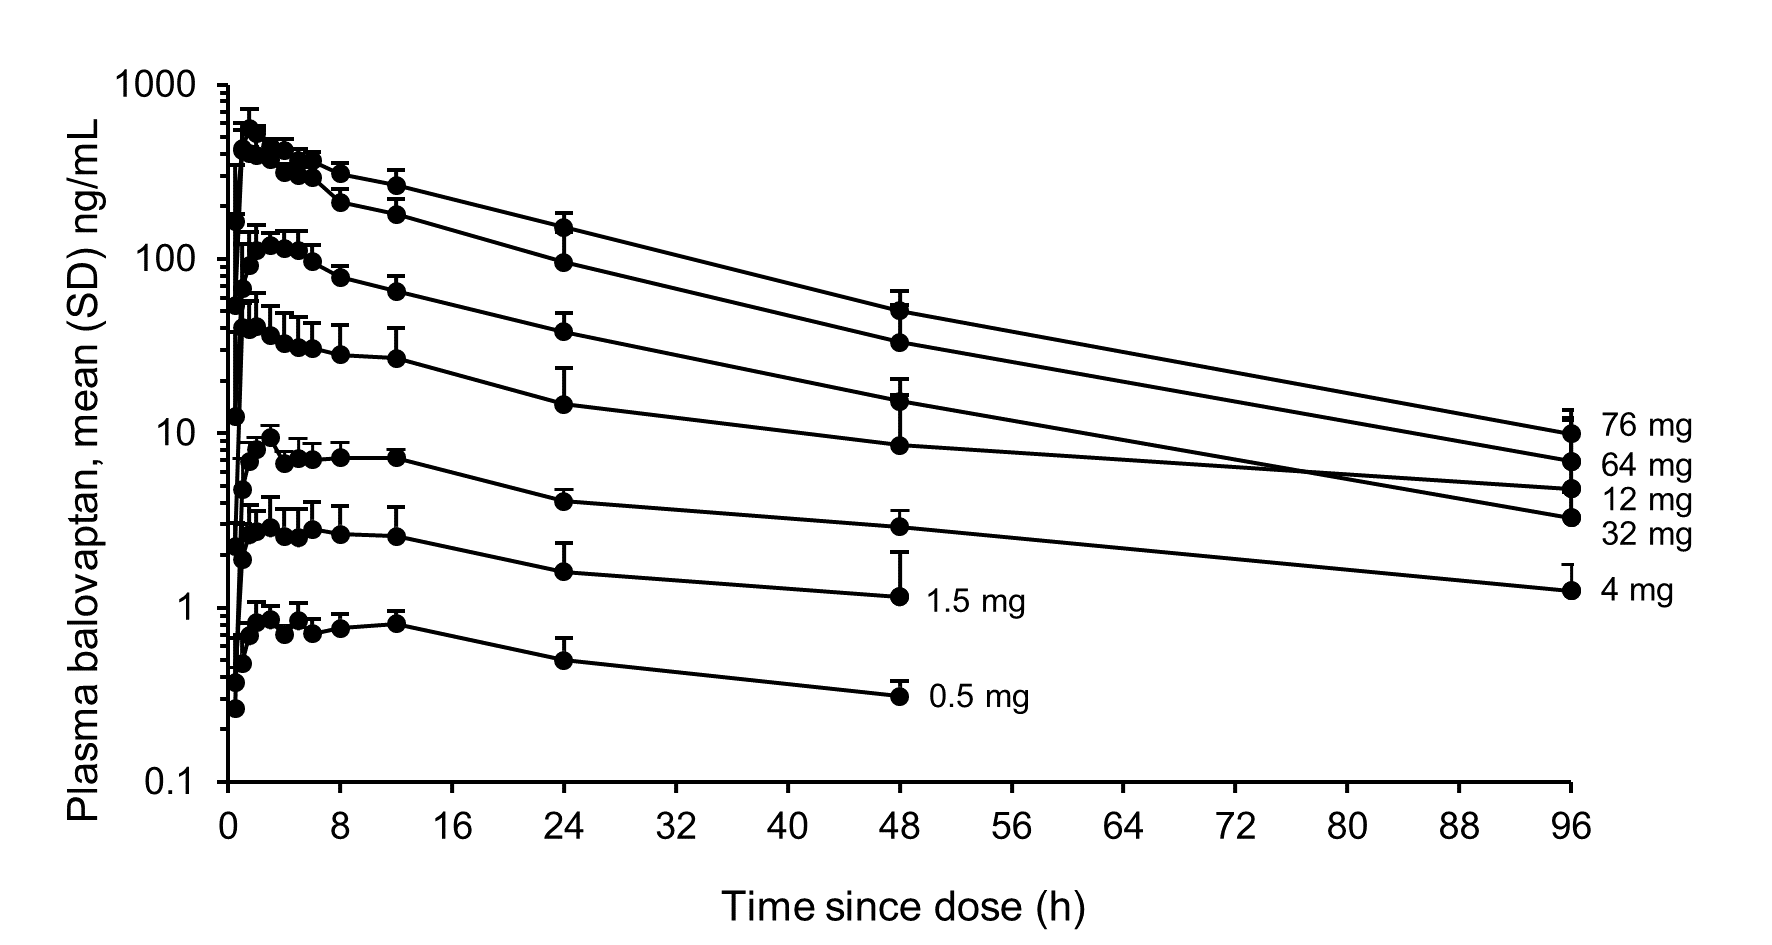 |
| --- | --- |
| **(b)** | 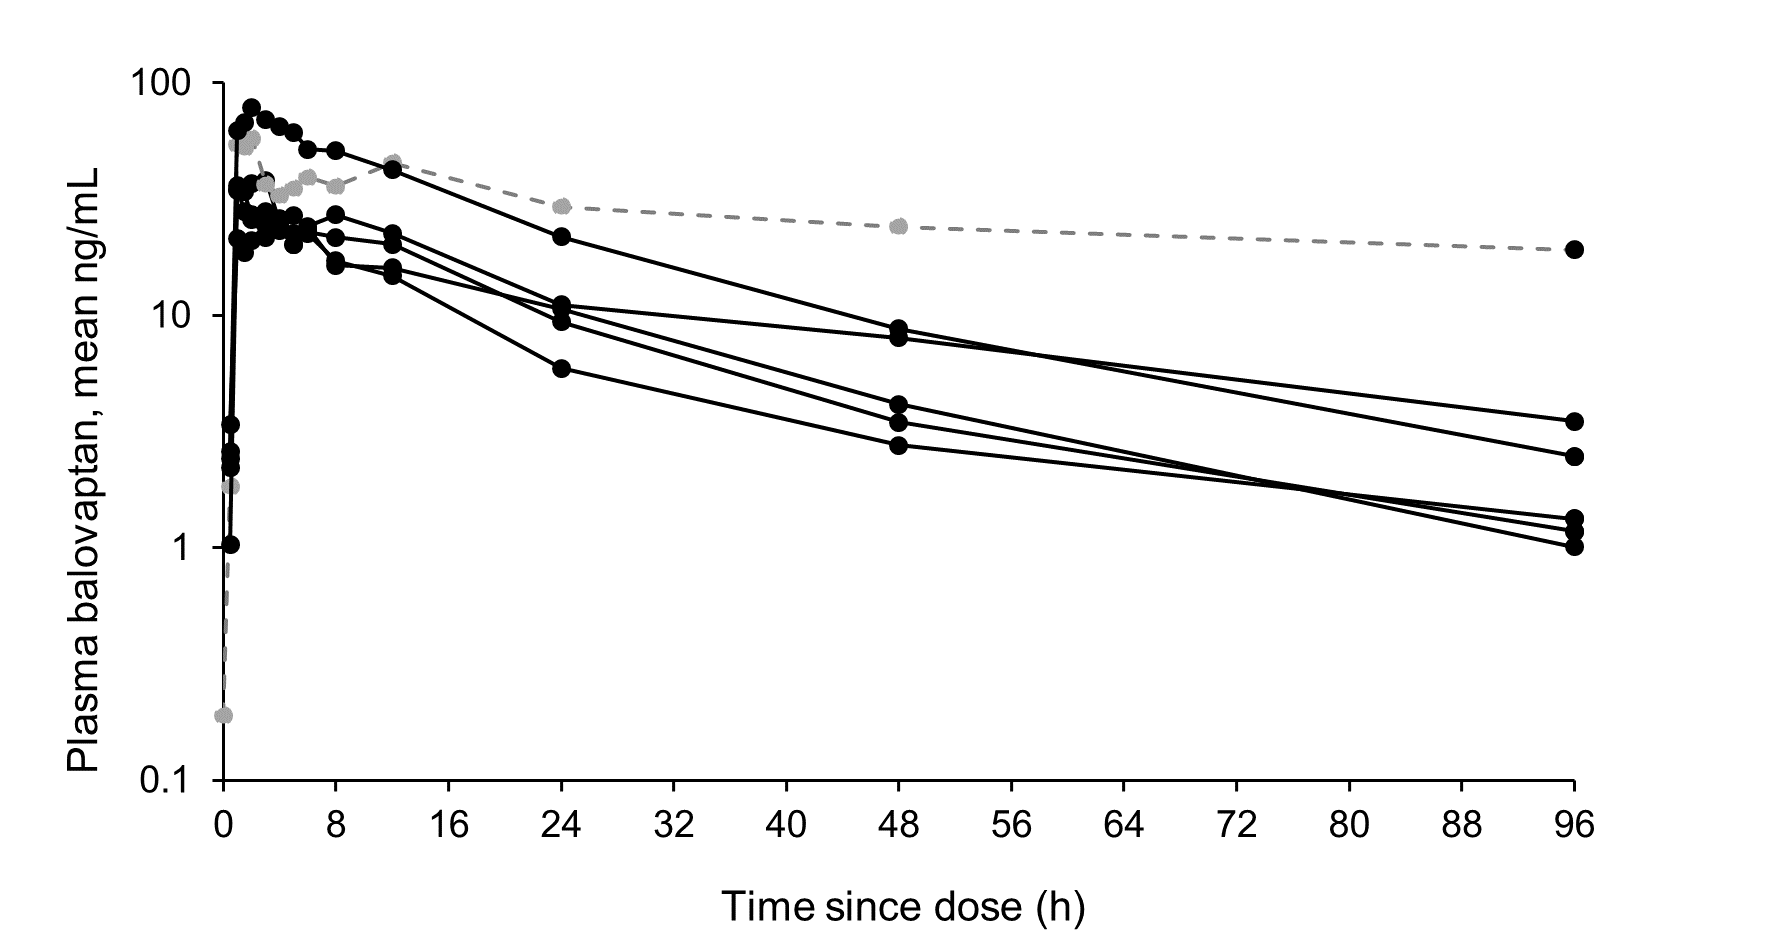 |
| **(c)** | 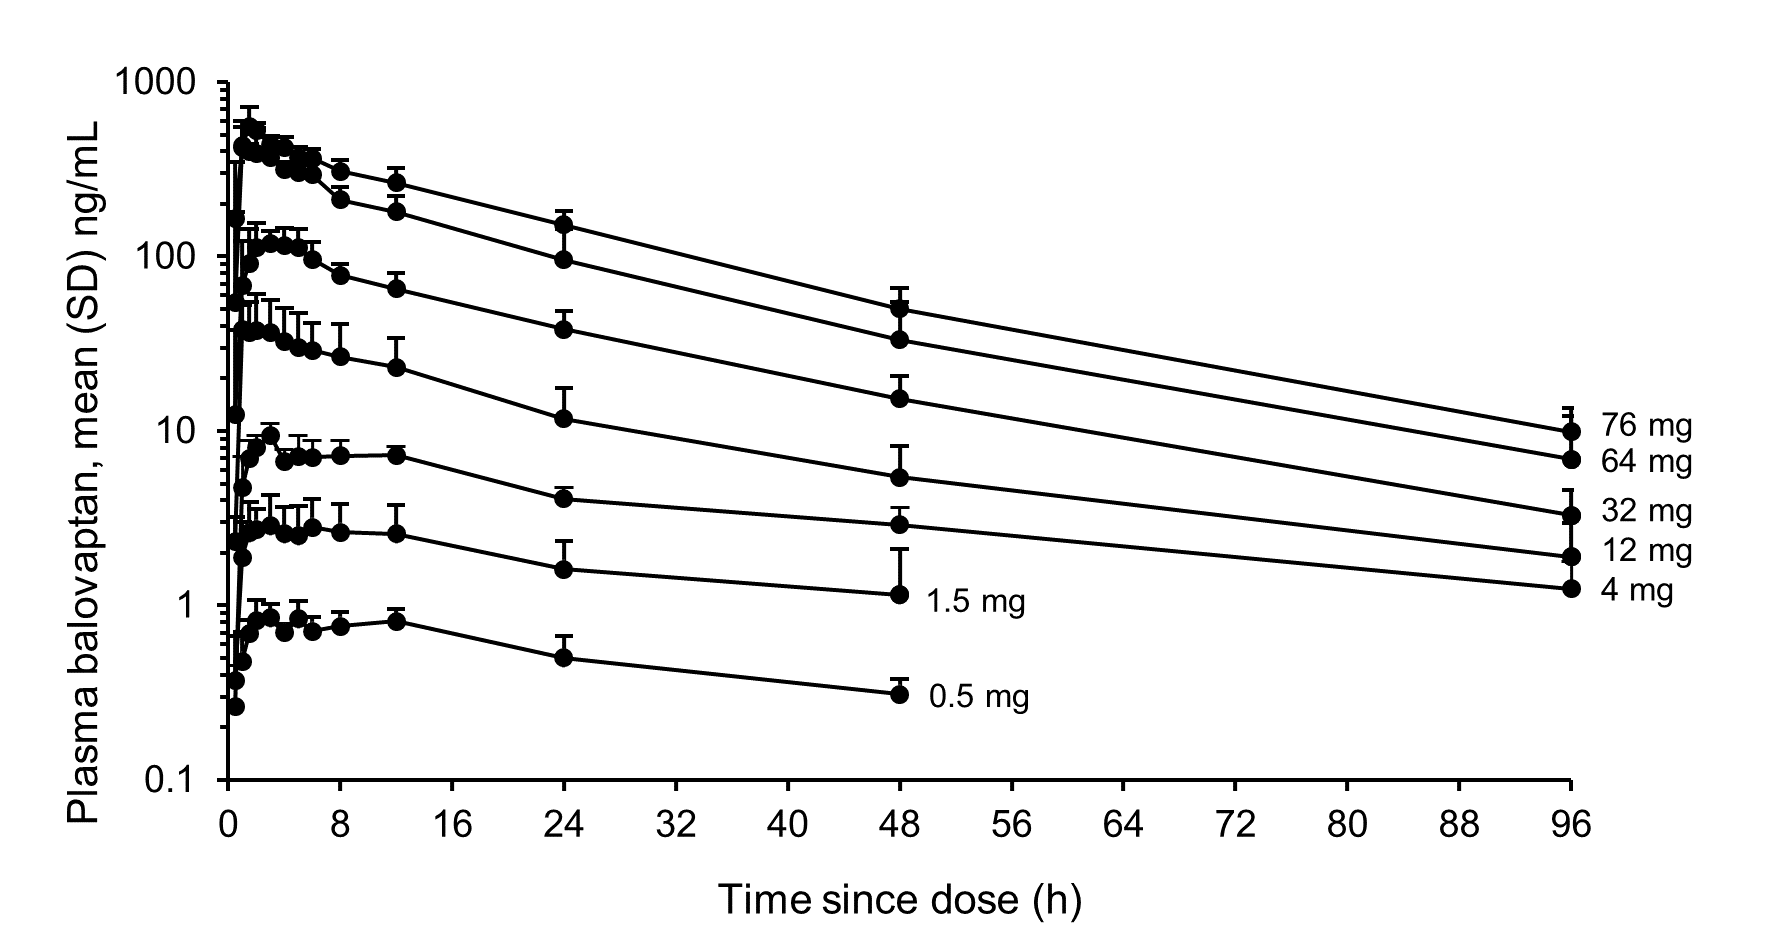 |

**Figure S5.** Balovaptan dose proportionality in study NCT01418963 Part 1 (SAD). *AUCinf* area under the balovaptan plasma concentration–time curve extrapolated to infinite time; *CI* confidence interval; *Cmax*maximum plasma concentration; *GMR* ratio of geometric means; *SAD* single-ascending dose.

**
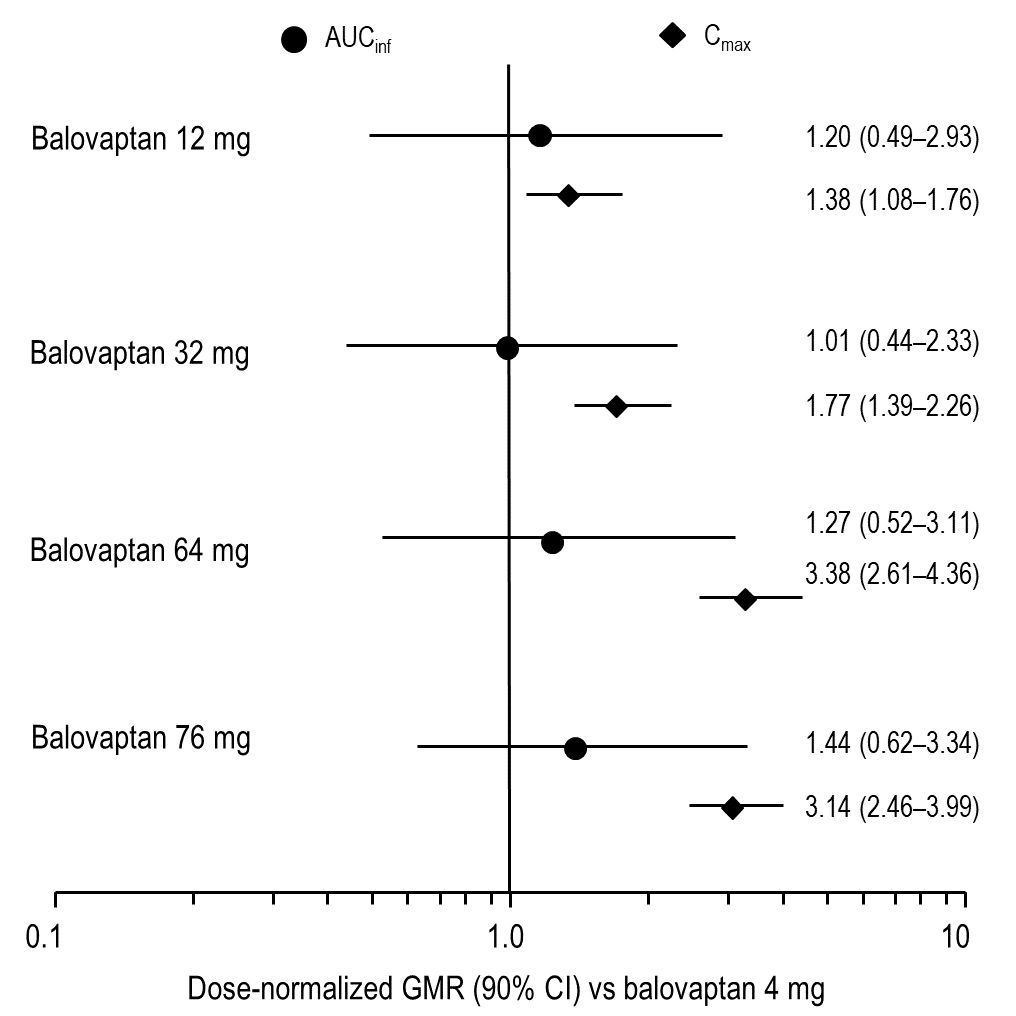
**
